# Supplementary material for: UK guidelines on oesophageal dilatation in clinical practice
Source: PubMed Central journal article supplement — Gut. 2018 Feb 24;67(6):1000–23. doi: 10.1136/gutjnl-2017-315414 (PMC5969363; doi:10.1136/gutjnl-2017-315414), 2018-02-24
Supplement: gutjnl-2017-315414supp001.pdf [file gutjnl-2017-315414supp001.pdf]

## UK guidelines on oesophageal dilatation in clinical practice.

### Appendix 1:

#### A- Search strategy with results (Medline)

| #  | Search Terms                                                                                                                                                                                                                                                                                                                                                                                 | Results |
|----|----------------------------------------------------------------------------------------------------------------------------------------------------------------------------------------------------------------------------------------------------------------------------------------------------------------------------------------------------------------------------------------------|---------|
| 1  | Constriction, Pathologic/                                                                                                                                                                                                                                                                                                                                                                    | 22550   |
| 2  | Esophagus/                                                                                                                                                                                                                                                                                                                                                                                   | 38939   |
| 3  | oesophagus.mp.                                                                                                                                                                                                                                                                                                                                                                               | 11461   |
| 4  | 2 or 3                                                                                                                                                                                                                                                                                                                                                                                       | 47248   |
| 5  | 1 and 4                                                                                                                                                                                                                                                                                                                                                                                      | 742     |
| 6  | Esophageal Stenosis/                                                                                                                                                                                                                                                                                                                                                                         | 7330    |
| 7  | 5 or 6                                                                                                                                                                                                                                                                                                                                                                                       | 8042    |
| 8  | ((oesophag* or esophag*) adj3 (strictur* or stenosis* or narrow* or constriction)).mp. [mp=title, abstract, original title, name of substance word, subject heading word, keyword heading word, protocol supplementary concept word, rare disease supplementary concept word, unique identifier]                                                                                             | 10173   |
| 9  | 7 or 8                                                                                                                                                                                                                                                                                                                                                                                       | 10321   |
| 10 | Esophagitis, Peptic/                                                                                                                                                                                                                                                                                                                                                                         | 4509    |
| 11 | Gastroesophageal Reflux/                                                                                                                                                                                                                                                                                                                                                                     | 22317   |
| 12 | (GORD or GERD or peptic or reflux or acid or benign or non-malignant).mp. [mp=title, abstract, original title, name of substance word, subject heading word, keyword heading word, protocol supplementary concept word, rare disease supplementary concept word, unique identifier]                                                                                                          | 2401835 |
| 13 | ((gastroesophageal or gastro esophageal or gastro oesophageal or gastro-esophageal or gastro-oesophageal or esophag* or oesophag* or gastric or acid) adj3 (reflux or peptic)).mp. [mp=title, abstract, original title, name of substance word, subject heading word, keyword heading word, protocol supplementary concept word, rare disease supplementary concept word, unique identifier] | 35489   |
| 14 | Constriction, Pathologic/                                                                                                                                                                                                                                                                                                                                                                    | 22550   |
| 15 | Esophagus/                                                                                                                                                                                                                                                                                                                                                                                   | 38939   |
| 16 | oesophagus.mp.                                                                                                                                                                                                                                                                                                                                                                               | 11461   |
| 17 | 15 or 16                                                                                                                                                                                                                                                                                                                                                                                     | 47248   |
| 18 | 14 and 17                                                                                                                                                                                                                                                                                                                                                                                    | 742     |
| 19 | Esophageal Stenosis/                                                                                                                                                                                                                                                                                                                                                                         | 7330    |
| 20 | 18 or 19                                                                                                                                                                                                                                                                                                                                                                                     | 8042    |
| 21 | ((oesophag* or esophag*) adj3 (strictur* or stenosis* or narrow* or constriction)).mp. [mp=title, abstract, original title, name of substance word, subject heading word, keyword heading word, protocol supplementary concept word, rare disease supplementary concept word, unique identifier]                                                                                             | 10173   |

|    |                                                                                                                                                                                                                                                                                                  |         |
|----|--------------------------------------------------------------------------------------------------------------------------------------------------------------------------------------------------------------------------------------------------------------------------------------------------|---------|
| 22 | 20 or 21                                                                                                                                                                                                                                                                                         | 10321   |
| 23 | 10 or 11 or 12 or 13                                                                                                                                                                                                                                                                             | 2401835 |
| 24 | 22 and 23                                                                                                                                                                                                                                                                                        | 3175    |
| 25 | Barrett Esophagus/                                                                                                                                                                                                                                                                               | 6613    |
| 26 | (barrett or barretts or barrett's).mp. [mp=title, abstract, original title, name of substance word, subject heading word, keyword heading word, protocol supplementary concept word, rare disease supplementary concept word, unique identifier]                                                 | 9227    |
| 27 | Endoscopy, Gastrointestinal/                                                                                                                                                                                                                                                                     | 14895   |
| 28 | 25 or 26                                                                                                                                                                                                                                                                                         | 9227    |
| 29 | Catheter Ablation/                                                                                                                                                                                                                                                                               | 23335   |
| 30 | radiofrequency ablation.mp.                                                                                                                                                                                                                                                                      | 9938    |
| 31 | Ablation Techniques/                                                                                                                                                                                                                                                                             | 1137    |
| 32 | Argon Plasma Coagulation/                                                                                                                                                                                                                                                                        | 229     |
| 33 | ((argon plasma or argon beam) adj (coagulation or ablation)).mp. [mp=title, abstract, original title, name of substance word, subject heading word, keyword heading word, protocol supplementary concept word, rare disease supplementary concept word, unique identifier]                       | 1096    |
| 34 | (photodynamic adj therap*).mp. [mp=title, abstract, original title, name of substance word, subject heading word, keyword heading word, protocol supplementary concept word, rare disease supplementary concept word, unique identifier]                                                         | 12724   |
| 35 | Cryotherapy/                                                                                                                                                                                                                                                                                     | 4011    |
| 36 | cryotherap*.mp. [mp=title, abstract, original title, name of substance word, subject heading word, keyword heading word, protocol supplementary concept word, rare disease supplementary concept word, unique identifier]                                                                        | 8224    |
| 37 | (cold adj therap*).mp. [mp=title, abstract, original title, name of substance word, subject heading word, keyword heading word, protocol supplementary concept word, rare disease supplementary concept word, unique identifier]                                                                 | 333     |
| 38 | 27 or 29 or 30 or 31 or 32 or 33 or 34 or 35 or 36 or 37                                                                                                                                                                                                                                         | 63112   |
| 39 | 28 and 38                                                                                                                                                                                                                                                                                        | 1277    |
| 40 | Constriction, Pathologic/                                                                                                                                                                                                                                                                        | 22550   |
| 41 | Esophagus/                                                                                                                                                                                                                                                                                       | 38939   |
| 42 | oesophagus.mp.                                                                                                                                                                                                                                                                                   | 11461   |
| 43 | 41 or 42                                                                                                                                                                                                                                                                                         | 47248   |
| 44 | 40 and 43                                                                                                                                                                                                                                                                                        | 742     |
| 45 | Esophageal Stenosis/                                                                                                                                                                                                                                                                             | 7330    |
| 46 | 44 or 45                                                                                                                                                                                                                                                                                         | 8042    |
| 47 | ((oesophag* or esophag*) adj3 (strictur* or stenosis* or narrow* or constriction)).mp. [mp=title, abstract, original title, name of substance word, subject heading word, keyword heading word, protocol supplementary concept word, rare disease supplementary concept word, unique identifier] | 10173   |

|    |                                                                                                                                                                                                                                                                                                  |       |
|----|--------------------------------------------------------------------------------------------------------------------------------------------------------------------------------------------------------------------------------------------------------------------------------------------------|-------|
| 48 | 46 or 47                                                                                                                                                                                                                                                                                         | 10321 |
| 49 | 39 and 48                                                                                                                                                                                                                                                                                        | 83    |
| 50 | 38 and 48                                                                                                                                                                                                                                                                                        | 343   |
| 51 | 49 or 50                                                                                                                                                                                                                                                                                         | 343   |
| 52 | Constriction, Pathologic/                                                                                                                                                                                                                                                                        | 22550 |
| 53 | Esophagus/                                                                                                                                                                                                                                                                                       | 38939 |
| 54 | oesophagus.mp.                                                                                                                                                                                                                                                                                   | 11461 |
| 55 | 53 or 54                                                                                                                                                                                                                                                                                         | 47248 |
| 56 | 52 and 55                                                                                                                                                                                                                                                                                        | 742   |
| 57 | Esophageal Stenosis/                                                                                                                                                                                                                                                                             | 7330  |
| 58 | 56 or 57                                                                                                                                                                                                                                                                                         | 8042  |
| 59 | ((oesophag* or esophag*) adj3 (strictur* or stenosis* or narrow* or constriction)).mp. [mp=title, abstract, original title, name of substance word, subject heading word, keyword heading word, protocol supplementary concept word, rare disease supplementary concept word, unique identifier] | 10173 |
| 60 | 58 or 59                                                                                                                                                                                                                                                                                         | 10321 |
| 61 | Endoscopy, Digestive System/                                                                                                                                                                                                                                                                     | 6799  |
| 62 | (endoscop* adj (resection or dissection)).mp. [mp=title, abstract, original title, name of substance word, subject heading word, keyword heading word, protocol supplementary concept word, rare disease supplementary concept word, unique identifier]                                          | 3062  |
| 63 | 61 or 62                                                                                                                                                                                                                                                                                         | 9802  |
| 64 | 60 and 63                                                                                                                                                                                                                                                                                        | 188   |
| 65 | Constriction, Pathologic/                                                                                                                                                                                                                                                                        | 22550 |
| 66 | Esophagus/                                                                                                                                                                                                                                                                                       | 38939 |
| 67 | oesophagus.mp.                                                                                                                                                                                                                                                                                   | 11461 |
| 68 | 66 or 67                                                                                                                                                                                                                                                                                         | 47248 |
| 69 | 65 and 68                                                                                                                                                                                                                                                                                        | 742   |
| 70 | Esophageal Stenosis/                                                                                                                                                                                                                                                                             | 7330  |
| 71 | 69 or 70                                                                                                                                                                                                                                                                                         | 8042  |
| 72 | ((oesophag* or esophag*) adj3 (strictur* or stenosis* or narrow* or constriction)).mp. [mp=title, abstract, original title, name of substance word, subject heading word, keyword heading word, protocol supplementary concept word, rare disease supplementary concept word, unique identifier] | 10173 |
| 73 | 71 or 72                                                                                                                                                                                                                                                                                         | 10321 |
| 74 | Sclerotherapy/                                                                                                                                                                                                                                                                                   | 4544  |
| 75 | Ligation/                                                                                                                                                                                                                                                                                        | 18650 |
| 76 | (band* adj ligation).mp. [mp=title, abstract, original title, name of substance word, subject heading word, keyword heading word, protocol supplementary concept word, rare disease supplementary concept word, unique identifier]                                                               | 997   |

|    |                                                                                                                                                                                                                                                                                                                    |        |
|----|--------------------------------------------------------------------------------------------------------------------------------------------------------------------------------------------------------------------------------------------------------------------------------------------------------------------|--------|
| 77 | (sclerotherap* or sclerosant*).mp. [mp=title, abstract, original title, name of substance word, subject heading word, keyword heading word, protocol supplementary concept word, rare disease supplementary concept word, unique identifier]                                                                       | 7975   |
| 78 | 74 or 75 or 76 or 77                                                                                                                                                                                                                                                                                               | 26267  |
| 79 | 73 and 78                                                                                                                                                                                                                                                                                                          | 184    |
| 80 | Eosinophilic Esophagitis/                                                                                                                                                                                                                                                                                          | 663    |
| 81 | (eosinophil* adj (esophag* or esophag*)).mp. [mp=title, abstract, original title, name of substance word, subject heading word, keyword heading word, protocol supplementary concept word, rare disease supplementary concept word, unique identifier]                                                             | 1444   |
| 82 | 80 or 81                                                                                                                                                                                                                                                                                                           | 1444   |
| 83 | (strictur* or stenosis* or narrow* or constriction).mp. [mp=title, abstract, original title, name of substance word, subject heading word, keyword heading word, protocol supplementary concept word, rare disease supplementary concept word, unique identifier]                                                  | 311610 |
| 84 | 82 and 83                                                                                                                                                                                                                                                                                                          | 229    |
| 85 | Constriction, Pathologic/                                                                                                                                                                                                                                                                                          | 22550  |
| 86 | Esophagus/                                                                                                                                                                                                                                                                                                         | 38939  |
| 87 | oesophagus.mp.                                                                                                                                                                                                                                                                                                     | 11461  |
| 88 | 86 or 87                                                                                                                                                                                                                                                                                                           | 47248  |
| 89 | 85 and 88                                                                                                                                                                                                                                                                                                          | 742    |
| 90 | Esophageal Stenosis/                                                                                                                                                                                                                                                                                               | 7330   |
| 91 | 89 or 90                                                                                                                                                                                                                                                                                                           | 8042   |
| 92 | ((oesophag* or esophag*) adj3 (strictur* or stenosis* or narrow* or constriction)).mp. [mp=title, abstract, original title, name of substance word, subject heading word, keyword heading word, protocol supplementary concept word, rare disease supplementary concept word, unique identifier]                   | 10173  |
| 93 | 91 or 92                                                                                                                                                                                                                                                                                                           | 10321  |
| 94 | Bariatric Surgery/                                                                                                                                                                                                                                                                                                 | 4823   |
| 95 | ((bariatric or obesity or metabolic) adj (surgery or operation* or procedure*)).mp. [mp=title, abstract, original title, name of substance word, subject heading word, keyword heading word, protocol supplementary concept word, rare disease supplementary concept word, unique identifier]                      | 10534  |
| 96 | (oesophagectom* or esophagectom* or anastom* or bypass or gastrectom* or gastropex* or gastroplast*).mp. [mp=title, abstract, original title, name of substance word, subject heading word, keyword heading word, protocol supplementary concept word, rare disease supplementary concept word, unique identifier] | 239054 |
| 97 | anastomosis, surgical/ or anastomosis, roux-en-y/ or esophagectomy/ or esophagoplasty/ or gastrectomy/ or gastropexy/ or gastroplasty/                                                                                                                                                                             | 64878  |
| 98 | 94 or 95 or 96 or 97                                                                                                                                                                                                                                                                                               | 246553 |
| 99 | 93 and 98                                                                                                                                                                                                                                                                                                          | 2145   |

|     |                                                                                                                                                                                                                                                                                                  |        |
|-----|--------------------------------------------------------------------------------------------------------------------------------------------------------------------------------------------------------------------------------------------------------------------------------------------------|--------|
| 100 | (strictur* or stenosis* or narrow* or constriction).mp. [mp=title, abstract, original title, name of substance word, subject heading word, keyword heading word, protocol supplementary concept word, rare disease supplementary concept word, unique identifier]                                | 311610 |
| 101 | (oesophagectom* or esophagectom*).mp. [mp=title, abstract, original title, name of substance word, subject heading word, keyword heading word, protocol supplementary concept word, rare disease supplementary concept word, unique identifier]                                                  | 9862   |
| 102 | esophagectomy/ or esophagoplasty/                                                                                                                                                                                                                                                                | 9537   |
| 103 | 101 or 102                                                                                                                                                                                                                                                                                       | 12387  |
| 104 | 100 and 103                                                                                                                                                                                                                                                                                      | 1829   |
| 105 | 99 or 104                                                                                                                                                                                                                                                                                        | 2722   |
| 106 | Constriction, Pathologic/                                                                                                                                                                                                                                                                        | 22550  |
| 107 | Esophagus/                                                                                                                                                                                                                                                                                       | 38939  |
| 108 | oesophagus.mp.                                                                                                                                                                                                                                                                                   | 11461  |
| 109 | 107 or 108                                                                                                                                                                                                                                                                                       | 47248  |
| 110 | 106 and 109                                                                                                                                                                                                                                                                                      | 742    |
| 111 | Esophageal Stenosis/                                                                                                                                                                                                                                                                             | 7330   |
| 112 | 110 or 111                                                                                                                                                                                                                                                                                       | 8042   |
| 113 | ((oesophag* or esophag*) adj3 (strictur* or stenosis* or narrow* or constriction)).mp. [mp=title, abstract, original title, name of substance word, subject heading word, keyword heading word, protocol supplementary concept word, rare disease supplementary concept word, unique identifier] | 10173  |
| 114 | 112 or 113                                                                                                                                                                                                                                                                                       | 10321  |
| 115 | Abnormalities, Radiation-Induced/                                                                                                                                                                                                                                                                | 789    |
| 116 | Radiation/                                                                                                                                                                                                                                                                                       | 5043   |
| 117 | Radiotherapy/                                                                                                                                                                                                                                                                                    | 37382  |
| 118 | (radiation* or radiotherap*).mp. [mp=title, abstract, original title, name of substance word, subject heading word, keyword heading word, protocol supplementary concept word, rare disease supplementary concept word, unique identifier]                                                       | 519017 |
| 119 | Neoplasms/                                                                                                                                                                                                                                                                                       | 316866 |
| 120 | (malignan* or cancerous or neoplastic).mp. [mp=title, abstract, original title, name of substance word, subject heading word, keyword heading word, protocol supplementary concept word, rare disease supplementary concept word, unique identifier]                                             | 630381 |
| 121 | 115 or 116 or 117 or 118                                                                                                                                                                                                                                                                         | 519017 |
| 122 | 114 and 121                                                                                                                                                                                                                                                                                      | 549    |
| 123 | 119 or 120                                                                                                                                                                                                                                                                                       | 890793 |
| 124 | 114 and 123                                                                                                                                                                                                                                                                                      | 1052   |
| 125 | 122 or 124                                                                                                                                                                                                                                                                                       | 1454   |

|     |                                                                                                                                                                                                                                                                                                  |         |
|-----|--------------------------------------------------------------------------------------------------------------------------------------------------------------------------------------------------------------------------------------------------------------------------------------------------|---------|
| 126 | Constriction, Pathologic/                                                                                                                                                                                                                                                                        | 22550   |
| 127 | Esophagus/                                                                                                                                                                                                                                                                                       | 38939   |
| 128 | oesophagus.mp.                                                                                                                                                                                                                                                                                   | 11461   |
| 129 | 127 or 128                                                                                                                                                                                                                                                                                       | 47248   |
| 130 | 126 and 129                                                                                                                                                                                                                                                                                      | 742     |
| 131 | Esophageal Stenosis/                                                                                                                                                                                                                                                                             | 7330    |
| 132 | 130 or 131                                                                                                                                                                                                                                                                                       | 8042    |
| 133 | ((oesophag* or esophag*) adj3 (strictur* or stenosis* or narrow* or constriction)).mp. [mp=title, abstract, original title, name of substance word, subject heading word, keyword heading word, protocol supplementary concept word, rare disease supplementary concept word, unique identifier] | 10173   |
| 134 | 132 or 133                                                                                                                                                                                                                                                                                       | 10321   |
| 135 | exp Esophageal Stenosis/ci [Chemically Induced]                                                                                                                                                                                                                                                  | 894     |
| 136 | Burns, Chemical/                                                                                                                                                                                                                                                                                 | 5770    |
| 137 | 135 and 136                                                                                                                                                                                                                                                                                      | 734     |
| 138 | Caustics/                                                                                                                                                                                                                                                                                        | 1658    |
| 139 | (caustic* or corrosive* or chemical*).mp. [mp=title, abstract, original title, name of substance word, subject heading word, keyword heading word, protocol supplementary concept word, rare disease supplementary concept word, unique identifier]                                              | 801266  |
| 140 | 138 or 139                                                                                                                                                                                                                                                                                       | 801266  |
| 141 | 134 and 140                                                                                                                                                                                                                                                                                      | 1813    |
| 142 | 137 or 141                                                                                                                                                                                                                                                                                       | 1813    |
| 143 | Constriction, Pathologic/                                                                                                                                                                                                                                                                        | 22550   |
| 144 | Esophagus/                                                                                                                                                                                                                                                                                       | 38939   |
| 145 | oesophagus.mp.                                                                                                                                                                                                                                                                                   | 11461   |
| 146 | 144 or 145                                                                                                                                                                                                                                                                                       | 47248   |
| 147 | 143 and 146                                                                                                                                                                                                                                                                                      | 742     |
| 148 | Esophageal Stenosis/                                                                                                                                                                                                                                                                             | 7330    |
| 149 | 147 or 148                                                                                                                                                                                                                                                                                       | 8042    |
| 150 | ((oesophag* or esophag*) adj3 (strictur* or stenosis* or narrow* or constriction)).mp. [mp=title, abstract, original title, name of substance word, subject heading word, keyword heading word, protocol supplementary concept word, rare disease supplementary concept word, unique identifier] | 10173   |
| 151 | 149 or 150                                                                                                                                                                                                                                                                                       | 10321   |
| 152 | refractory.mp.                                                                                                                                                                                                                                                                                   | 92147   |
| 153 | complex.mp.                                                                                                                                                                                                                                                                                      | 996875  |
| 154 | 152 or 153                                                                                                                                                                                                                                                                                       | 1084624 |
| 155 | 151 and 154                                                                                                                                                                                                                                                                                      | 327     |

|     |                                                                                                                                                                                                                                                                                                                           |         |
|-----|---------------------------------------------------------------------------------------------------------------------------------------------------------------------------------------------------------------------------------------------------------------------------------------------------------------------------|---------|
| 156 | (schatzki or schatzki's).mp. [mp=title, abstract, original title, name of substance word, subject heading word, keyword heading word, protocol supplementary concept word, rare disease supplementary concept word, unique identifier]                                                                                    | 136     |
| 157 | 9 or 24 or 51 or 64 or 79 or 84 or 105 or 125 or 142 or 155 or 156                                                                                                                                                                                                                                                        | 11023   |
| 158 | Dilatation/                                                                                                                                                                                                                                                                                                               | 8768    |
| 159 | Therapeutics/                                                                                                                                                                                                                                                                                                             | 8099    |
| 160 | (dilatation or dilation or dilate or dilating or management or managing or treat* or therap*).mp. [mp=title, abstract, original title, name of substance word, subject heading word, keyword heading word, protocol supplementary concept word, rare disease supplementary concept word, unique identifier]               | 6218155 |
| 161 | 158 or 159 or 160                                                                                                                                                                                                                                                                                                         | 6218155 |
| 162 | 157 and 161                                                                                                                                                                                                                                                                                                               | 6295    |
| 163 | Esophageal Achalasia/                                                                                                                                                                                                                                                                                                     | 5595    |
| 164 | ((esophag* adj achalasia*) or (oesophag* adj achalasia*) or cardiospasm* or megaesophagus or megaesophagus).mp. [mp=title, abstract, original title, name of substance word, subject heading word, keyword heading word, protocol supplementary concept word, rare disease supplementary concept word, unique identifier] | 6127    |
| 165 | 163 or 164                                                                                                                                                                                                                                                                                                                | 6127    |
| 166 | 161 and 165                                                                                                                                                                                                                                                                                                               | 3130    |
| 167 | 162 or 166                                                                                                                                                                                                                                                                                                                | 9213    |
| 168 | ((esophag* or oesophag*) adj3 (dilatation or dilation or dilate or dilating)).mp. [mp=title, abstract, original title, name of substance word, subject heading word, keyword heading word, protocol supplementary concept word, rare disease supplementary concept word, unique identifier]                               | 1695    |
| 169 | 167 or 168                                                                                                                                                                                                                                                                                                                | 9753    |
| 170 | limit 169 to humans                                                                                                                                                                                                                                                                                                       | 8266    |

## B- Search strategy with results (Embase).

| #  | Search Terms                                                                                                                                                                                                                                                                                                               | Results |
|----|----------------------------------------------------------------------------------------------------------------------------------------------------------------------------------------------------------------------------------------------------------------------------------------------------------------------------|---------|
| 1  | Constriction, Pathologic/                                                                                                                                                                                                                                                                                                  | 4007    |
| 2  | Esophagus/                                                                                                                                                                                                                                                                                                                 | 50580   |
| 3  | oesophagus.mp.                                                                                                                                                                                                                                                                                                             | 14254   |
| 4  | 2 or 3                                                                                                                                                                                                                                                                                                                     | 59948   |
| 5  | 1 and 4                                                                                                                                                                                                                                                                                                                    | 48      |
| 6  | Esophageal Stenosis/                                                                                                                                                                                                                                                                                                       | 6004    |
| 7  | 5 or 6                                                                                                                                                                                                                                                                                                                     | 6044    |
| 8  | ((oesophag* or esophag*) adj3 (strictur* or stenosis* or narrow* or constriction)).mp. [mp=title, abstract, heading word, drug trade name, original title, device manufacturer, drug manufacturer, device trade name, keyword]                                                                                             | 13311   |
| 9  | 7 or 8                                                                                                                                                                                                                                                                                                                     | 13343   |
| 10 | Esophagitis, Peptic/                                                                                                                                                                                                                                                                                                       | 9345    |
| 11 | Gastroesophageal Reflux/                                                                                                                                                                                                                                                                                                   | 40886   |
| 12 | (GORD or GERD or peptic or reflux or acid or benign or non-malignant).mp. [mp=title, abstract, heading word, drug trade name, original title, device manufacturer, drug manufacturer, device trade name, keyword]                                                                                                          | 3518245 |
| 13 | ((gastroesophageal or gastro esophageal or gastro oesophageal or gastro-esophageal or gastro-oesophageal or esophag* or oesophag* or gastric or acid) adj3 (reflux or peptic)).mp. [mp=title, abstract, heading word, drug trade name, original title, device manufacturer, drug manufacturer, device trade name, keyword] | 56257   |
| 14 | Constriction, Pathologic/                                                                                                                                                                                                                                                                                                  | 4007    |
| 15 | Esophagus/                                                                                                                                                                                                                                                                                                                 | 50580   |
| 16 | oesophagus.mp.                                                                                                                                                                                                                                                                                                             | 14254   |
| 17 | 15 or 16                                                                                                                                                                                                                                                                                                                   | 59948   |
| 18 | 14 and 17                                                                                                                                                                                                                                                                                                                  | 48      |
| 19 | Esophageal Stenosis/                                                                                                                                                                                                                                                                                                       | 6004    |
| 20 | 18 or 19                                                                                                                                                                                                                                                                                                                   | 6044    |
| 21 | ((oesophag* or esophag*) adj3 (strictur* or stenosis* or narrow* or constriction)).mp. [mp=title, abstract, heading word, drug trade name, original title, device manufacturer, drug manufacturer, device trade name, keyword]                                                                                             | 13311   |
| 22 | 20 or 21                                                                                                                                                                                                                                                                                                                   | 13343   |
| 23 | 10 or 11 or 12 or 13                                                                                                                                                                                                                                                                                                       | 3518245 |
| 24 | 22 and 23                                                                                                                                                                                                                                                                                                                  | 4913    |
| 25 | Barrett Esophagus/                                                                                                                                                                                                                                                                                                         | 12516   |
| 26 | (barrett or barretts or barrett's).mp. [mp=title, abstract, heading word, drug trade                                                                                                                                                                                                                                       | 15236   |



|    |                                                                                                                                                                                                                                |        |
|----|--------------------------------------------------------------------------------------------------------------------------------------------------------------------------------------------------------------------------------|--------|
|    | name, original title, device manufacturer, drug manufacturer, device trade name, keyword]                                                                                                                                      |        |
| 27 | Endoscopy, Gastrointestinal/                                                                                                                                                                                                   | 24916  |
| 28 | 25 or 26                                                                                                                                                                                                                       | 15236  |
| 29 | Catheter Ablation/                                                                                                                                                                                                             | 24084  |
| 30 | radiofrequency ablation.mp.                                                                                                                                                                                                    | 25151  |
| 31 | Ablation Techniques/                                                                                                                                                                                                           | 9023   |
| 32 | Argon Plasma Coagulation/                                                                                                                                                                                                      | 3004   |
| 33 | ((argon plasma or argon beam) adj (coagulation or ablation)).mp. [mp=title, abstract, heading word, drug trade name, original title, device manufacturer, drug manufacturer, device trade name, keyword]                       | 3341   |
| 34 | (photodynamic adj therap*).mp. [mp=title, abstract, heading word, drug trade name, original title, device manufacturer, drug manufacturer, device trade name, keyword]                                                         | 21365  |
| 35 | Cryotherapy/                                                                                                                                                                                                                   | 13578  |
| 36 | cryotherap*.mp. [mp=title, abstract, heading word, drug trade name, original title, device manufacturer, drug manufacturer, device trade name, keyword]                                                                        | 16250  |
| 37 | (cold adj therap*).mp. [mp=title, abstract, heading word, drug trade name, original title, device manufacturer, drug manufacturer, device trade name, keyword]                                                                 | 354    |
| 38 | 27 or 29 or 30 or 31 or 32 or 33 or 34 or 35 or 36 or 37                                                                                                                                                                       | 112041 |
| 39 | 28 and 38                                                                                                                                                                                                                      | 2975   |
| 40 | Constriction, Pathologic/                                                                                                                                                                                                      | 4007   |
| 41 | Esophagus/                                                                                                                                                                                                                     | 50580  |
| 42 | oesophagus.mp.                                                                                                                                                                                                                 | 14254  |
| 43 | 41 or 42                                                                                                                                                                                                                       | 59948  |
| 44 | 40 and 43                                                                                                                                                                                                                      | 48     |
| 45 | Esophageal Stenosis/                                                                                                                                                                                                           | 6004   |
| 46 | 44 or 45                                                                                                                                                                                                                       | 6044   |
| 47 | ((oesophag* or esophag*) adj3 (strictur* or stenosis* or narrow* or constriction)).mp. [mp=title, abstract, heading word, drug trade name, original title, device manufacturer, drug manufacturer, device trade name, keyword] | 13311  |
| 48 | 46 or 47                                                                                                                                                                                                                       | 13343  |
| 49 | 39 and 48                                                                                                                                                                                                                      | 405    |
| 50 | 38 and 48                                                                                                                                                                                                                      | 1024   |
| 51 | 49 or 50                                                                                                                                                                                                                       | 1024   |
| 52 | Constriction, Pathologic/                                                                                                                                                                                                      | 4007   |
| 53 | Esophagus/                                                                                                                                                                                                                     | 50580  |
| 54 | oesophagus.mp.                                                                                                                                                                                                                 | 14254  |

|    |                                                                                                                                                                                                                                |       |
|----|--------------------------------------------------------------------------------------------------------------------------------------------------------------------------------------------------------------------------------|-------|
| 55 | 53 or 54                                                                                                                                                                                                                       | 59948 |
| 56 | 52 and 55                                                                                                                                                                                                                      | 48    |
| 57 | Esophageal Stenosis/                                                                                                                                                                                                           | 6004  |
| 58 | 56 or 57                                                                                                                                                                                                                       | 6044  |
| 59 | ((oesophag* or esophag*) adj3 (strictur* or stenosis* or narrow* or constriction)).mp. [mp=title, abstract, heading word, drug trade name, original title, device manufacturer, drug manufacturer, device trade name, keyword] | 13311 |
| 60 | 58 or 59                                                                                                                                                                                                                       | 13343 |
| 61 | Endoscopy, Digestive System/                                                                                                                                                                                                   | 3803  |
| 62 | (endoscop* adj (resection or dissection)).mp. [mp=title, abstract, heading word, drug trade name, original title, device manufacturer, drug manufacturer, device trade name, keyword]                                          | 5063  |
| 63 | 61 or 62                                                                                                                                                                                                                       | 8843  |
| 64 | 60 and 63                                                                                                                                                                                                                      | 226   |
| 65 | Constriction, Pathologic/                                                                                                                                                                                                      | 4007  |
| 66 | Esophagus/                                                                                                                                                                                                                     | 50580 |
| 67 | oesophagus.mp.                                                                                                                                                                                                                 | 14254 |
| 68 | 66 or 67                                                                                                                                                                                                                       | 59948 |
| 69 | 65 and 68                                                                                                                                                                                                                      | 48    |
| 70 | Esophageal Stenosis/                                                                                                                                                                                                           | 6004  |
| 71 | 69 or 70                                                                                                                                                                                                                       | 6044  |
| 72 | ((oesophag* or esophag*) adj3 (strictur* or stenosis* or narrow* or constriction)).mp. [mp=title, abstract, heading word, drug trade name, original title, device manufacturer, drug manufacturer, device trade name, keyword] | 13311 |
| 73 | 71 or 72                                                                                                                                                                                                                       | 13343 |
| 74 | Sclerotherapy/                                                                                                                                                                                                                 | 8806  |
| 75 | Ligation/                                                                                                                                                                                                                      | 22721 |
| 76 | (band* adj ligation).mp. [mp=title, abstract, heading word, drug trade name, original title, device manufacturer, drug manufacturer, device trade name, keyword]                                                               | 1642  |
| 77 | (sclerotherap* or sclerosant*).mp. [mp=title, abstract, heading word, drug trade name, original title, device manufacturer, drug manufacturer, device trade name, keyword]                                                     | 13152 |
| 78 | 74 or 75 or 76 or 77                                                                                                                                                                                                           | 35526 |
| 79 | 73 and 78                                                                                                                                                                                                                      | 351   |
| 80 | Eosinophilic Esophagitis/                                                                                                                                                                                                      | 3077  |
| 81 | (eosinophil* adj (esophag* or esophag*)).mp. [mp=title, abstract, heading word, drug trade name, original title, device manufacturer, drug manufacturer, device trade name, keyword]                                           | 3374  |

|     |                                                                                                                                                                                                                                                  |        |
|-----|--------------------------------------------------------------------------------------------------------------------------------------------------------------------------------------------------------------------------------------------------|--------|
| 82  | 80 or 81                                                                                                                                                                                                                                         | 3374   |
| 83  | (strictur* or stenosis* or narrow* or constriction).mp. [mp=title, abstract, heading word, drug trade name, original title, device manufacturer, drug manufacturer, device trade name, keyword]                                                  | 402683 |
| 84  | 82 and 83                                                                                                                                                                                                                                        | 626    |
| 85  | Constriction, Pathologic/                                                                                                                                                                                                                        | 4007   |
| 86  | Esophagus/                                                                                                                                                                                                                                       | 50580  |
| 87  | oesophagus.mp.                                                                                                                                                                                                                                   | 14254  |
| 88  | 86 or 87                                                                                                                                                                                                                                         | 59948  |
| 89  | 85 and 88                                                                                                                                                                                                                                        | 48     |
| 90  | Esophageal Stenosis/                                                                                                                                                                                                                             | 6004   |
| 91  | 89 or 90                                                                                                                                                                                                                                         | 6044   |
| 92  | ((oesophag* or esophag*) adj3 (strictur* or stenosis* or narrow* or constriction)).mp. [mp=title, abstract, heading word, drug trade name, original title, device manufacturer, drug manufacturer, device trade name, keyword]                   | 13311  |
| 93  | 91 or 92                                                                                                                                                                                                                                         | 13343  |
| 94  | Bariatric Surgery/                                                                                                                                                                                                                               | 17073  |
| 95  | ((bariatric or obesity or metabolic) adj (surgery or operation* or procedure*)).mp. [mp=title, abstract, heading word, drug trade name, original title, device manufacturer, drug manufacturer, device trade name, keyword]                      | 21504  |
| 96  | (oesophagectom* or esophagectom* or anastom* or bypass or gastrectom* or gastropex* or gastroplast*).mp. [mp=title, abstract, heading word, drug trade name, original title, device manufacturer, drug manufacturer, device trade name, keyword] | 337919 |
| 97  | anastomosis, surgical/ or anastomosis, roux-en-y/ or esophagectomy/ or esophagoplasty/ or gastrectomy/ or gastropexy/ or gastroplasty/                                                                                                           | 86107  |
| 98  | 94 or 95 or 96 or 97                                                                                                                                                                                                                             | 353734 |
| 99  | 93 and 98                                                                                                                                                                                                                                        | 3156   |
| 100 | (strictur* or stenosis* or narrow* or constriction).mp. [mp=title, abstract, heading word, drug trade name, original title, device manufacturer, drug manufacturer, device trade name, keyword]                                                  | 402683 |
| 101 | (oesophagectom* or esophagectom*).mp. [mp=title, abstract, heading word, drug trade name, original title, device manufacturer, drug manufacturer, device trade name, keyword]                                                                    | 10755  |
| 102 | esophagectomy/ or esophagoplasty/                                                                                                                                                                                                                | 17119  |
| 103 | 101 or 102                                                                                                                                                                                                                                       | 18747  |
| 104 | 100 and 103                                                                                                                                                                                                                                      | 2810   |
| 105 | 99 or 104                                                                                                                                                                                                                                        | 4117   |
| 106 | Constriction, Pathologic/                                                                                                                                                                                                                        | 4007   |

|     |                                                                                                                                                                                                                                |        |
|-----|--------------------------------------------------------------------------------------------------------------------------------------------------------------------------------------------------------------------------------|--------|
| 107 | Esophagus/                                                                                                                                                                                                                     | 50580  |
| 108 | oesophagus.mp.                                                                                                                                                                                                                 | 14254  |
| 109 | 107 or 108                                                                                                                                                                                                                     | 59948  |
| 110 | 106 and 109                                                                                                                                                                                                                    | 48     |
| 111 | Esophageal Stenosis/                                                                                                                                                                                                           | 6004   |
| 112 | 110 or 111                                                                                                                                                                                                                     | 6044   |
| 113 | ((oesophag* or esophag*) adj3 (strictur* or stenosis* or narrow* or constriction)).mp. [mp=title, abstract, heading word, drug trade name, original title, device manufacturer, drug manufacturer, device trade name, keyword] | 13311  |
| 114 | 112 or 113                                                                                                                                                                                                                     | 13343  |
| 115 | Abnormalities, Radiation-Induced/                                                                                                                                                                                              | 127025 |
| 116 | Radiation/                                                                                                                                                                                                                     | 41969  |
| 117 | Radiotherapy/                                                                                                                                                                                                                  | 98451  |
| 118 | (radiation* or radiotherap*).mp. [mp=title, abstract, heading word, drug trade name, original title, device manufacturer, drug manufacturer, device trade name, keyword]                                                       | 844303 |
| 119 | Neoplasms/                                                                                                                                                                                                                     | 257822 |
| 120 | (malignan* or cancerous or neoplastic).mp. [mp=title, abstract, heading word, drug trade name, original title, device manufacturer, drug manufacturer, device trade name, keyword]                                             | 703763 |
| 121 | 115 or 116 or 117 or 118                                                                                                                                                                                                       | 969579 |
| 122 | 114 and 121                                                                                                                                                                                                                    | 1476   |
| 123 | 119 or 120                                                                                                                                                                                                                     | 918244 |
| 124 | 114 and 123                                                                                                                                                                                                                    | 1553   |
| 125 | 122 or 124                                                                                                                                                                                                                     | 2745   |
| 126 | Constriction, Pathologic/                                                                                                                                                                                                      | 4007   |
| 127 | Esophagus/                                                                                                                                                                                                                     | 50580  |
| 128 | oesophagus.mp.                                                                                                                                                                                                                 | 14254  |
| 129 | 127 or 128                                                                                                                                                                                                                     | 59948  |
| 130 | 126 and 129                                                                                                                                                                                                                    | 48     |
| 131 | Esophageal Stenosis/                                                                                                                                                                                                           | 6004   |
| 132 | 130 or 131                                                                                                                                                                                                                     | 6044   |
| 133 | ((oesophag* or esophag*) adj3 (strictur* or stenosis* or narrow* or constriction)).mp. [mp=title, abstract, heading word, drug trade name, original title, device manufacturer, drug manufacturer, device trade name, keyword] | 13311  |
| 134 | 132 or 133                                                                                                                                                                                                                     | 13343  |
| 135 | exp Esophageal Stenosis/ci [Chemically Induced]                                                                                                                                                                                | 0      |
| 136 | Burns, Chemical/                                                                                                                                                                                                               | 3804   |

|     |                                                                                                                                                                                                                                           |         |
|-----|-------------------------------------------------------------------------------------------------------------------------------------------------------------------------------------------------------------------------------------------|---------|
| 137 | 135 and 136                                                                                                                                                                                                                               | 0       |
| 138 | Caustics/                                                                                                                                                                                                                                 | 1487    |
| 139 | (caustic* or corrosive* or chemical*).mp. [mp=title, abstract, heading word, drug trade name, original title, device manufacturer, drug manufacturer, device trade name, keyword]                                                         | 1320363 |
| 140 | 138 or 139                                                                                                                                                                                                                                | 1320363 |
| 141 | 134 and 140                                                                                                                                                                                                                               | 1984    |
| 142 | 137 or 141                                                                                                                                                                                                                                | 1984    |
| 143 | Constriction, Pathologic/                                                                                                                                                                                                                 | 4007    |
| 144 | Esophagus/                                                                                                                                                                                                                                | 50580   |
| 145 | oesophagus.mp.                                                                                                                                                                                                                            | 14254   |
| 146 | 144 or 145                                                                                                                                                                                                                                | 59948   |
| 147 | 143 and 146                                                                                                                                                                                                                               | 48      |
| 148 | Esophageal Stenosis/                                                                                                                                                                                                                      | 6004    |
| 149 | 147 or 148                                                                                                                                                                                                                                | 6044    |
| 150 | ((oesophag* or esophag*) adj3 (strictur* or stenosis* or narrow* or constriction)).mp. [mp=title, abstract, heading word, drug trade name, original title, device manufacturer, drug manufacturer, device trade name, keyword]            | 13311   |
| 151 | 149 or 150                                                                                                                                                                                                                                | 13343   |
| 152 | refractory.mp.                                                                                                                                                                                                                            | 136543  |
| 153 | complex.mp.                                                                                                                                                                                                                               | 1213853 |
| 154 | 152 or 153                                                                                                                                                                                                                                | 1342451 |
| 155 | 151 and 154                                                                                                                                                                                                                               | 554     |
| 156 | (schatzki or schatzki's).mp. [mp=title, abstract, heading word, drug trade name, original title, device manufacturer, drug manufacturer, device trade name, keyword]                                                                      | 236     |
| 157 | 9 or 24 or 51 or 64 or 79 or 84 or 105 or 125 or 142 or 155 or 156                                                                                                                                                                        | 14632   |
| 158 | Dilatation/                                                                                                                                                                                                                               | 10923   |
| 159 | Therapeutics/                                                                                                                                                                                                                             | 1208880 |
| 160 | (dilatation or dilation or dilate or dilating or management or managing or treat* or therap*).mp. [mp=title, abstract, heading word, drug trade name, original title, device manufacturer, drug manufacturer, device trade name, keyword] | 9157026 |
| 161 | 158 or 159 or 160                                                                                                                                                                                                                         | 9157026 |
| 162 | 157 and 161                                                                                                                                                                                                                               | 9943    |
| 163 | Esophageal Achalasia/                                                                                                                                                                                                                     | 7597    |
| 164 | ((esophag* adj achalasia*) or (oesophag* adj achalasia*) or cardiospasm* or megaesophagus or megaesophagus).mp. [mp=title, abstract, heading word, drug trade name, original title, device manufacturer, drug manufacturer, device trade  | 9298    |

|     |                                                                                                                                                                                                                                 |       |
|-----|---------------------------------------------------------------------------------------------------------------------------------------------------------------------------------------------------------------------------------|-------|
|     | name, keyword]                                                                                                                                                                                                                  |       |
| 165 | 163 or 164                                                                                                                                                                                                                      | 9298  |
| 166 | 161 and 165                                                                                                                                                                                                                     | 5561  |
| 167 | 162 or 166                                                                                                                                                                                                                      | 15049 |
| 168 | ((esophag* or oesophag*) adj3 (dilatation or dilation or dilate or dilating)).mp.<br>[mp=title, abstract, heading word, drug trade name, original title, device<br>manufacturer, drug manufacturer, device trade name, keyword] | 4132  |
| 169 | 167 or 168                                                                                                                                                                                                                      | 16414 |
| 170 | limit 169 to humans                                                                                                                                                                                                             | 13243 |
| 171 | limit 170 to exclude medline journals                                                                                                                                                                                           | 1180  |

**C- Search strategy with results (CENTAL): No additional results.**
